# Supplementary material for: Realizing high energy storage performance in (Na 0.47 Bi 0.47 )Ba 0.06 TiO 3 -based ceramics with a slush-like polar state
Source: Royal Society of Chemistry journal article supplement (doi:10.1039/d5ta08140h), 2025-12-12
Supplement: d5ta08140h1.pdf [file d5ta08140h1.pdf]

# **Realizing high energy storage performance in $(\text{Na}_{0.47}\text{Bi}_{0.47})\text{Ba}_{0.06}\text{TiO}_3$ -based ceramics with a slush-like polar state**

Lian Deng, Jiangping Huang, Yue Pan, Xu Li\*, Yu Zhang, Xiuli Chen, Huanfu Zhou

Key Laboratory of New Processing Technology for Nonferrous Metal and Materials, Ministry of Education, Guangxi Key Laboratory of Optical and Electronic Materials and Devices, College of Materials Science and Engineering, Guilin University of Technology, Guilin, 541004, China

\* Corresponding author.

E-mail address: lx100527@163.com. (X. Li).

## 1.1 Experimental procedure

### Structural and electrical performance characterization

The phase structure of the synthesized ceramics was characterized by X-ray diffraction (XRD; X'Pert PRO, PANalytical, Almelo, The Netherlands). Rietveld refinement of the XRD data was performed using the GSAS software package. Microstructural analysis was conducted using scanning electron microscopy (FE-SEM, Model S4800, Hitachi, Japan). Domain structures were examined by field-emission transmission electron microscopy (FE-TEM, JEM-2100F, JEOL, Tokyo, Japan). Dielectric properties were measured using a precision impedance analyzer (4294A, Agilent Technologies, Palo Alto, CA). Ferroelectric properties were evaluated with a standardized ferroelectric test system (RT66A, Radiant Technologies, Albuquerque, NM, USA). Raman spectra were acquired in the backscattering mode using a micro-Raman spectrometer (XploRA, Horiba Scientific, France) with a 532 nm laser source. Domain morphology and their behavior under electric field application and removal were further investigated by piezoresponse force microscopy (PFM; MFP-3D, Asylum Research, Santa Barbara, CA, USA). Charge-discharge performance was assessed using a charge and discharge test system (PK-CPR1701, PolyK Technologies, PA, USA).

### 1.2 The dielectric relaxation behavior:

$$\Delta T_{\text{relaxor}} = T_s(10\text{kHz}) - T_s(1\text{MHz}) \quad (\text{S1})$$

where  $T_s(10\text{ kHz})$  and  $T_s(1\text{ MHz})$  are the values of  $T_s$  at frequencies of 1 kHz and 1 MHz, respectively, as identified on the dielectric temperature spectrum.

### 1.3 Curie-Weiss model and Vogel-Fulcher theory:

According to the Curie-Weiss model and Vogel-Fulcher theory, the calculation formula is as follows :

$$\varepsilon_r = \frac{C}{T - T_{CW}} \quad (\text{S2})$$

$$f = f_0 \exp\left[\frac{-E_a}{k_B(T_m - T_f)}\right] \quad (\text{S3})$$

where  $C$  and  $T_{CW}$  are the Curie constant and the Curie-Weiss temperature, respectively;  $f$  is the test frequency;  $T_m$  is the temperature corresponding to the maximum dielectric constant.;  $f_0$  is the characteristic frequency (dynamic transition frequency/ion attempt jump barrier frequency in the double-well model );  $E_a$  is the activation energy.

## 2. Supplementary Figures

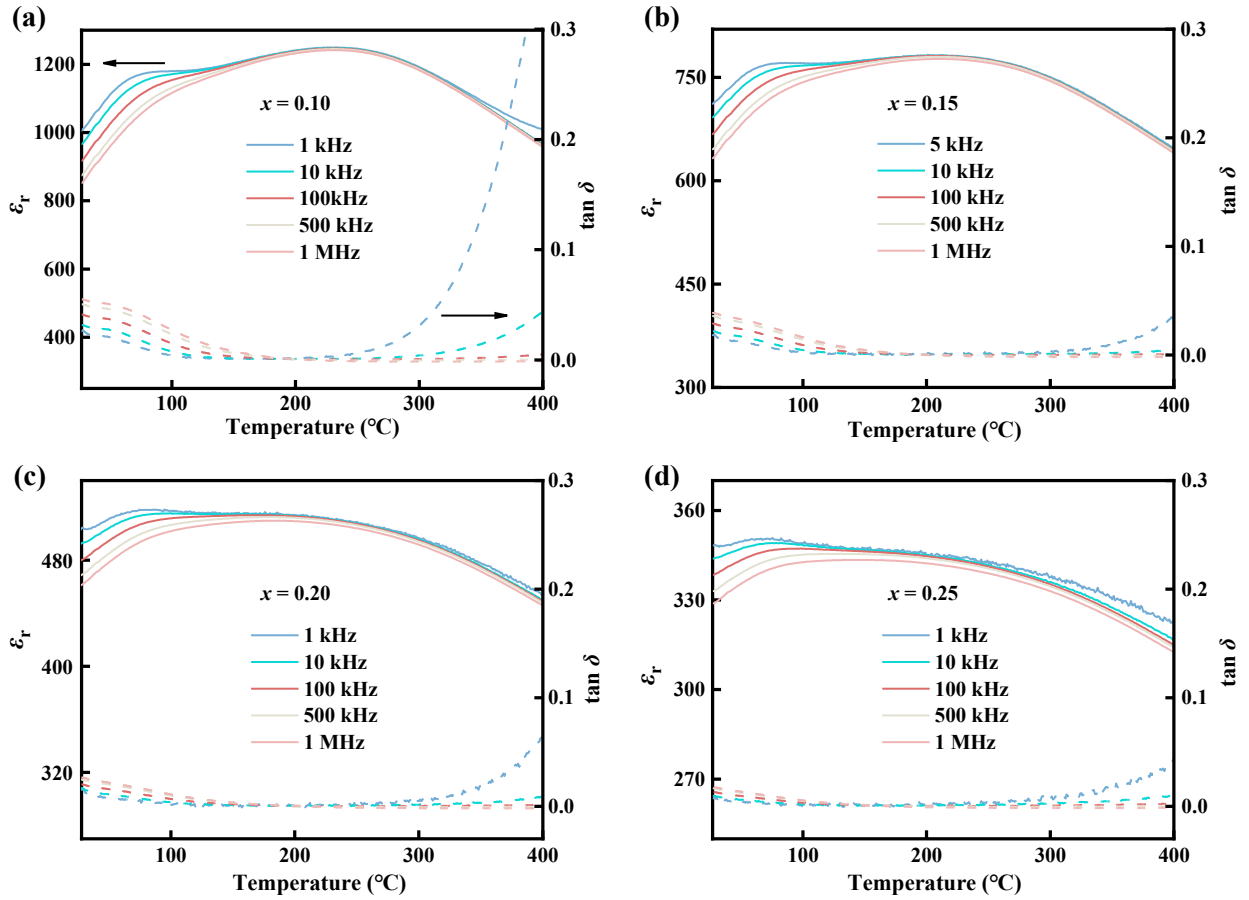

**Fig. S1.** Temperature-dependent  $\epsilon_r$  of  $x$ LMN ceramics at various frequencies.

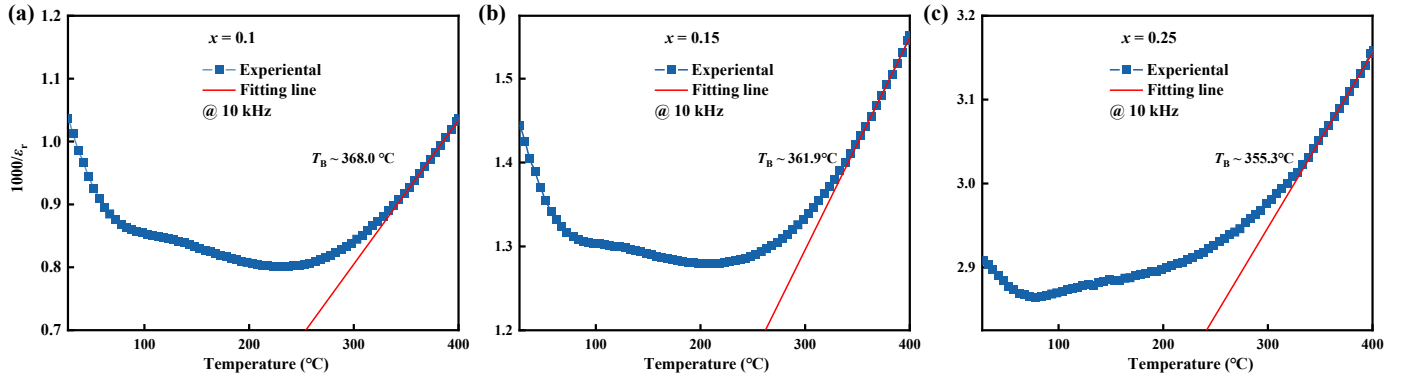

**Fig. S2.** Temperature-dependent  $1000/\epsilon_r$  of (a) 0.10LMN, (b) 0.15LMN, (c) 0.25LMN ceramics.

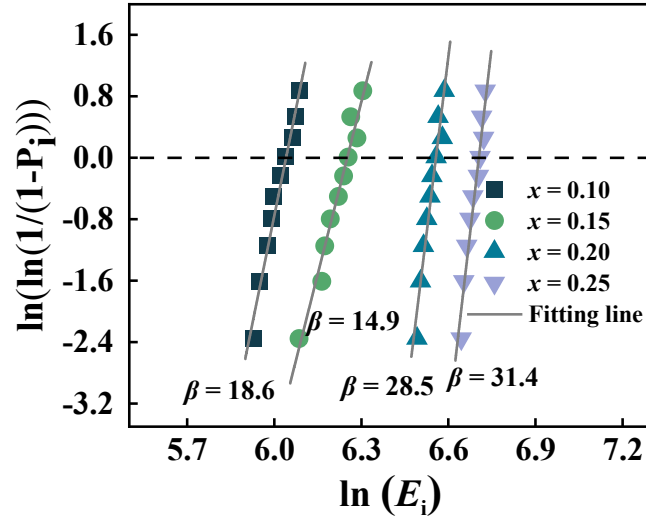

**Fig. S3.** Weibull distribution function of the breakdown strength for  $x$ LMN ceramics.

**Table S1.** Rietveld refinement parameters of the  $x$ LMN ceramics.

| $x$  | Space group    | Lattice parameters                                                                          | $V$ ( $\text{\AA}^3$ ) | $R_{wp}$ (%) | $R_p$ (%) | $\chi^2$ |
|------|----------------|---------------------------------------------------------------------------------------------|------------------------|--------------|-----------|----------|
| 0.10 | $R3c$ (45.6%)  | $a = b = 5.5272(5)$ , $c = 13.5401(4)$ , $\alpha = \beta = 90^\circ$ , $\gamma = 120^\circ$ | 358.238                | 3.05         | 2.29      | 1.633    |
|      | $P4bm$ (54.4%) | $a = b = 5.5303(3)$ , $c = 3.9113(4)$ , $\alpha = \beta = \gamma = 90^\circ$                | 119.627                |              |           |          |
| 0.15 | $R3c$ (35.5%)  | $a = b = 5.5316(5)$ , $c = 13.5460(7)$ , $\alpha = \beta = 90^\circ$ , $\gamma = 120^\circ$ | 358.966                | 3.46         | 2.46      | 2.113    |
|      | $P4bm$ (64.5%) | $a = b = 5.5166(8)$ , $c = 3.9031(0)$ , $\alpha = \beta = \gamma = 90^\circ$                | 119.943                |              |           |          |
| 0.20 | $R3c$ (23.6%)  | $a = b = 5.5340(5)$ , $c = 13.5726(6)$ , $\alpha = \beta = 90^\circ$ , $\gamma = 120^\circ$ | 359.983                | 4.09         | 2.80      | 2.814    |
|      | $P4bm$ (76.4%) | $a = b = 5.5429(2)$ , $c = 3.9196(7)$ , $\alpha = \beta = \gamma = 90^\circ$                | 120.426                |              |           |          |
| 0.25 | $R3c$ (17.1%)  | $a = b = 5.5468(5)$ , $c = 13.5869(5)$ , $\alpha = \beta = 90^\circ$ , $\gamma = 120^\circ$ | 362.031                | 4.49         | 2.88      | 3.521    |
|      | $P4bm$ (82.9%) | $a = b = 5.5478(4)$ , $c = 3.9252(1)$ , $\alpha = \beta = \gamma = 90^\circ$                | 120.812                |              |           |          |

**Table S2.** The V-F fitting parameters of  $x$ LMN ceramics.

| Component  | $f_0$ (Hz)         | $T_f$ (°C) | $E_a$ (eV) |
|------------|--------------------|------------|------------|
| $x = 0.10$ | $1 \times 10^{11}$ | 29.3       | 0.026      |
| $x = 0.15$ | $5 \times 10^{11}$ | 18.8       | 0.075      |
| $x = 0.20$ | $1 \times 10^{12}$ | -9.9       | 0.121      |
| $x = 0.25$ | $1 \times 10^{10}$ | -54.6      | 0.158      |
